# Supplementary material
Source: PubMed Central journal article supplement (PMC6717682)

## TABLE OF CONTENTS

| <u>Page</u> | <u>Contents</u>                                                                                                                                                                      |
|-------------|--------------------------------------------------------------------------------------------------------------------------------------------------------------------------------------|
| 2           | Derivation of quality-adjusted life year (QALY) and cost data                                                                                                                        |
| 3           | Narrative primary study results from a societal perspective                                                                                                                          |
| 4           | Supplemental Figure 1: Tornado diagram evaluating sensitivity of model inputs from societal perspective (willingness to pay = \$50,000 per QALY)                                     |
| 5           | Supplemental Figure 2: Tornado diagram evaluating sensitivity of model inputs from societal perspective (willingness to pay = \$100,000 per QALY)                                    |
| 6           | Supplemental Figure 3: Tornado diagram evaluating sensitivity of model inputs from societal perspective (willingness to pay = \$150,000 per QALY)                                    |
| 7           | Supplemental Figure 4: Tornado diagram evaluating sensitivity of model inputs from a societal perspective between rifaximin non-coverage and unrestricted coverage.                  |
| 8           | Supplemental Figure 5: Tornado diagram evaluating sensitivity of model inputs from a societal perspective between rifaximin non-coverage and formulary-restricted coverage.          |
| 9           | Supplemental Figure 6: Tornado diagram evaluating sensitivity of model inputs from a societal perspective between rifaximin formulary-restricted coverage and unrestricted coverage. |
| 7           | Supplemental Figure 7: Cost-effectiveness scatterplot of simulations across range of model inputs using probabilistic sensitivity analysis                                           |
| 8           | Supplemental Table 1: Univariate analysis of effects of rifaximin retreatment interval on cost-effectiveness from a payer perspective                                                |
| 9           | Supplemental Table 2: Univariate analysis of effects of health utility gain from response to therapy on cost-effectiveness from a payer perspective                                  |
| 10          | Supplemental Table 3: Univariate analysis of effects of rifaximin retreatment interval on cost-effectiveness from a payer perspective                                                |
| 11          | Supplemental Figure 8: Bivariate analysis of effects of daily wage and days of work-productivity lost on preferred strategy (willingness to pay = \$50,000 per QALY)                 |
| 12          | Supplemental Figure 9: Bivariate analysis of effects of daily wage and days of work-productivity lost on preferred strategy (willingness to pay = \$100,000 per QALY)                |
| 13          | Supplemental Figure 10: Bivariate analysis of effects of daily wage and days of work-productivity lost on preferred strategy (willingness to pay = \$150,000 per QALY)               |

## Derivation of quality-adjusted life year (QALY) and cost data

### *Quality-adjusted life years*

Individuals in our model gained quality-adjusted life years (QALY) depending on incremental response or non-response to therapy (or no therapy) during each cycle. QALYs were determined by multiplying the length of the time cycle (measured in years) by the health utility value associated with response/non-response. Health utility values ranged from 0 (death) to 1 (perfect health). QALYs were derived from the PROOF study<sup>13</sup>, a natural cohort study of IBS individuals which reported health utility values associated with clinically meaningful “considerable relief” or lack of considerable relief of symptoms.

### *Costs*

National average payer-reimbursed drug costs were sourced from the October 2016 Medicaid National Average Drug Acquisition Cost (NADAC) database<sup>2</sup>. Non-drug healthcare costs included the cost of an electrocardiogram, outpatient office visits, and average hospitalization cost for a primary diagnosis of IBS in 2016 (ICD-9 564.1) or discounted forward at a 3% annual rate if only earlier data were available. Healthcare utilization rates in the literature were used to determine how often these costs were incurred among therapeutic responders and non-responders.

Work-productivity losses were included in societal analysis and incurred during therapeutic non-response or if no therapy was received. Work-productivity losses were calculated by multiplying the average daily US wage by the number of work-days lost due to undertreated IBS.

### Results from a societal perspective

From a societal perspective (**Table 2**), the total cost of complete non-coverage of rifaximin was \$4,355 over one year, compared to \$7,608 with unrestricted coverage or \$4,783 with formulary-restricted coverage. The QALY gained over one year were similar among the three coverage strategies (0.747 to 0.752). Formulary-restricted rifaximin coverage was associated with an additional \$82,375 cost per QALY gained compared to complete non-coverage of rifaximin, based on the national average acquisition cost of rifaximin (\$29.78/pill). In contrast, unrestricted rifaximin access incurred \$1,138,254 additional cost per QALY gained compared to complete non-coverage of rifaximin.

Supplemental Figure 1: Tornado diagram evaluating sensitivity of model inputs from a payer perspective between rifaximin non-coverage and unrestricted coverage.

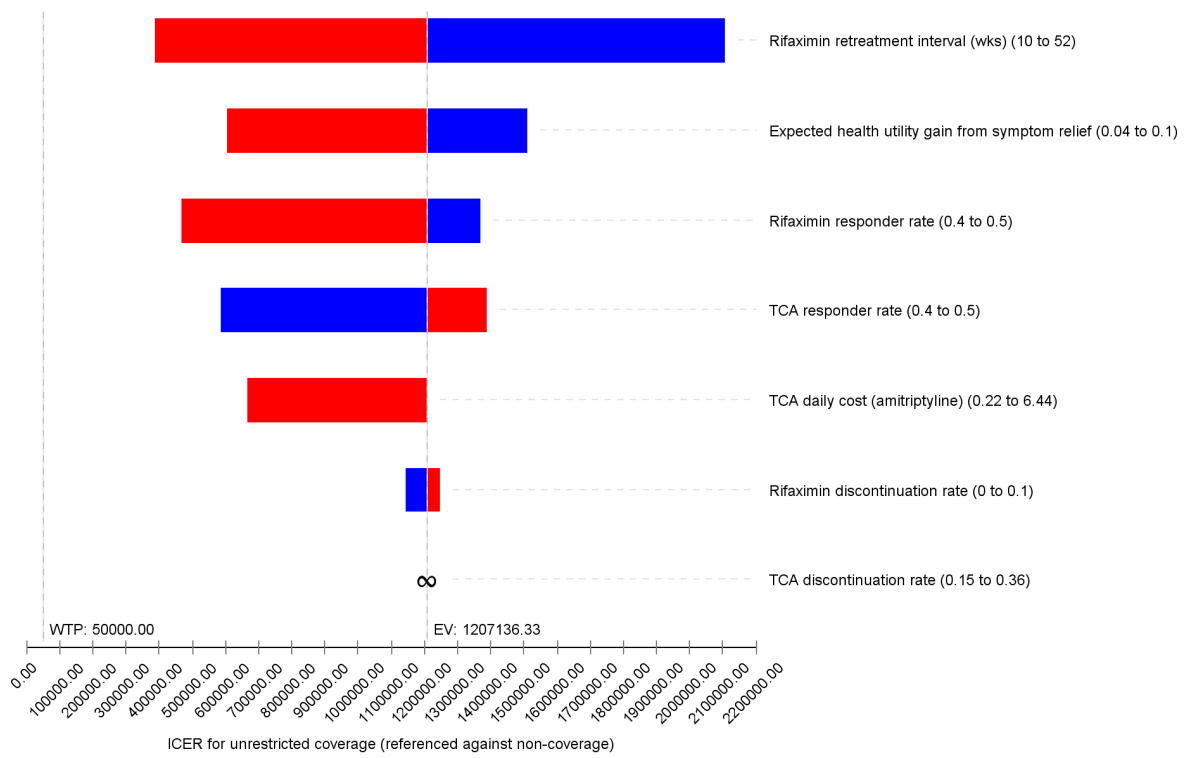

Red indicates that a decrease in the input value (compared to base-case value) leads to a decrease in the ICER. Blue indicates that an increase in the input value (compared to base-case value) leads to a decrease in the ICER compared to the average expected value (base-case ICER). ICER is most sensitive to the rifaximin retreatment interval.

Supplemental Figure 2: Tornado diagram evaluating sensitivity of model inputs from a payer perspective between rifaximin non-coverage and formulary-restricted coverage.

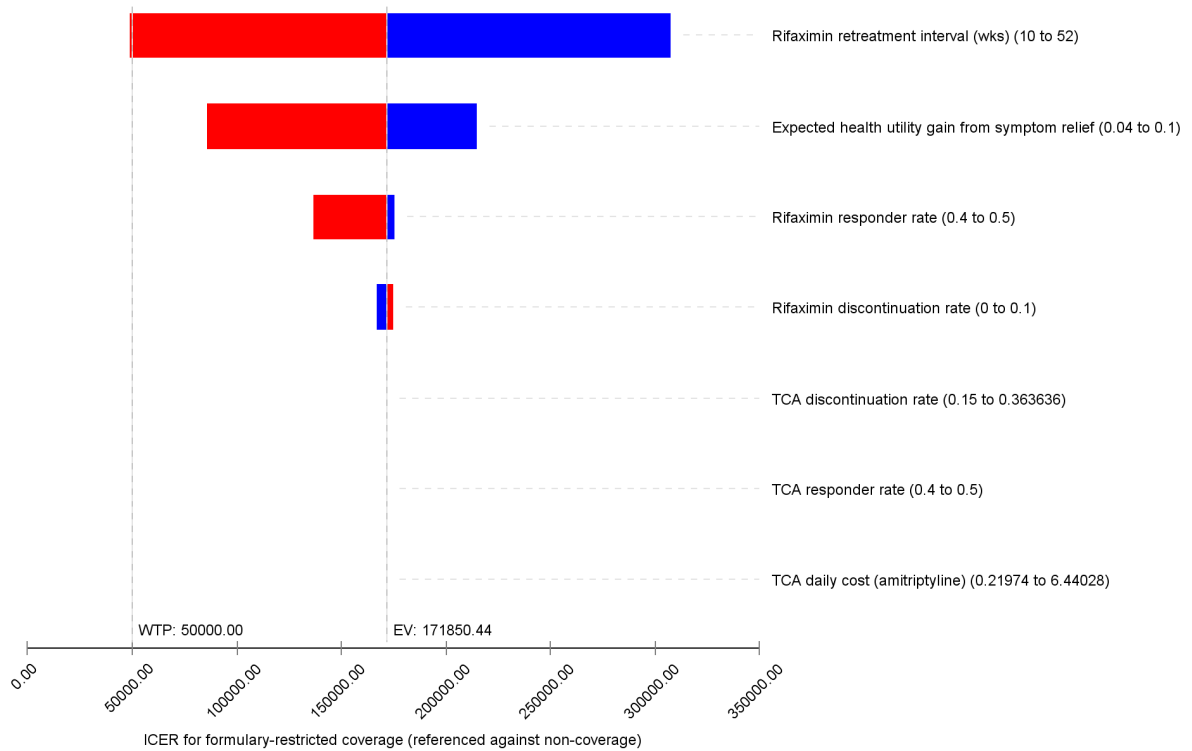

Red indicates that a decrease in the input value (compared to base-case value) leads to a decrease in the ICER. Blue indicates that an increase in the input value (compared to base-case value) leads to a decrease in the ICER compared to the average expected value (base-case ICER). ICER is most sensitive to the assumed rifaximin re-treatment interval. A longer assumed rifaximin retreatment interval of at least one year (i.e. prolonged response) is associated with a decrease in ICER below a WTP threshold of \$50,000/QALY-gained.

Supplemental Figure 3: Tornado diagram evaluating sensitivity of model inputs from a payer perspective between rifaximin formulary-restricted coverage and unrestricted coverage.

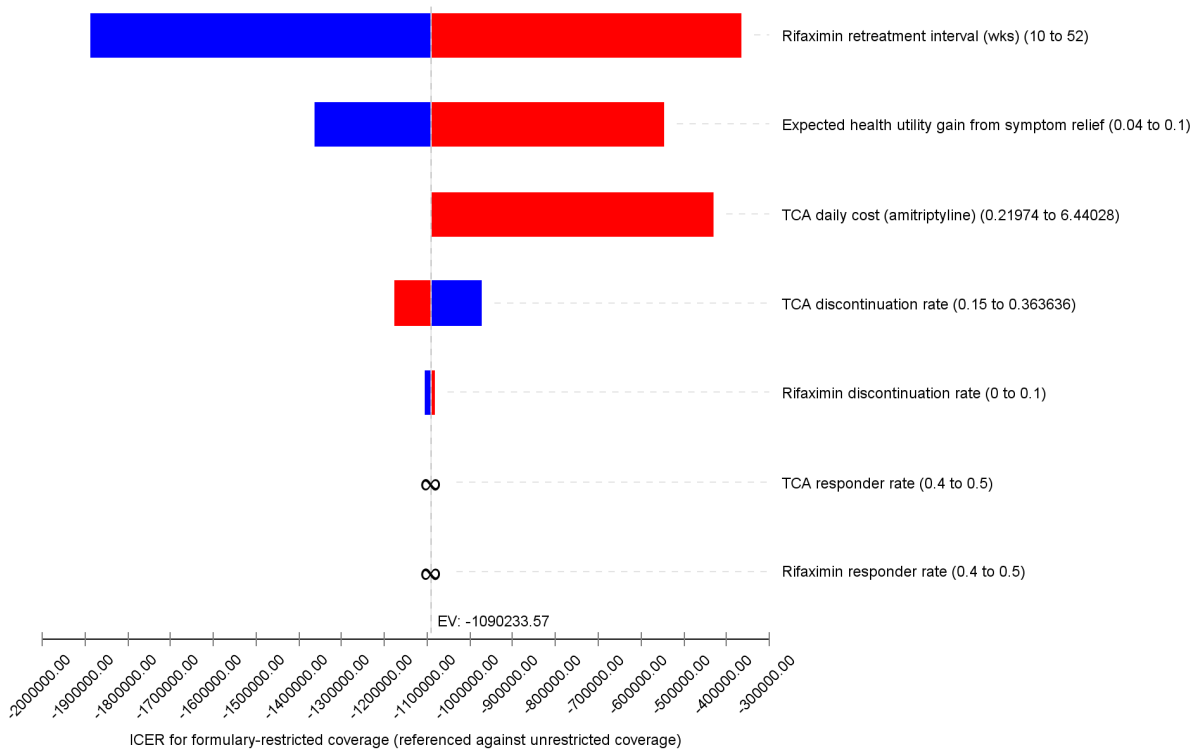

Red indicates that a decrease in the input value (compared to base-case value) leads to a decrease in the ICER. Blue indicates that an increase in the input value (compared to base-case value) leads to a decrease in the ICER compared to the average expected value (base-case ICER).

Negative ICER for this analysis specifically represent cost-savings and improved outcomes with formulary-restricted coverage compared to unrestricted coverage which is a stable finding throughout the range of estimates for each model input.

Supplemental Figure 4: Tornado diagram evaluating sensitivity of model inputs from a societal perspective between rifaximin non-coverage and unrestricted coverage.

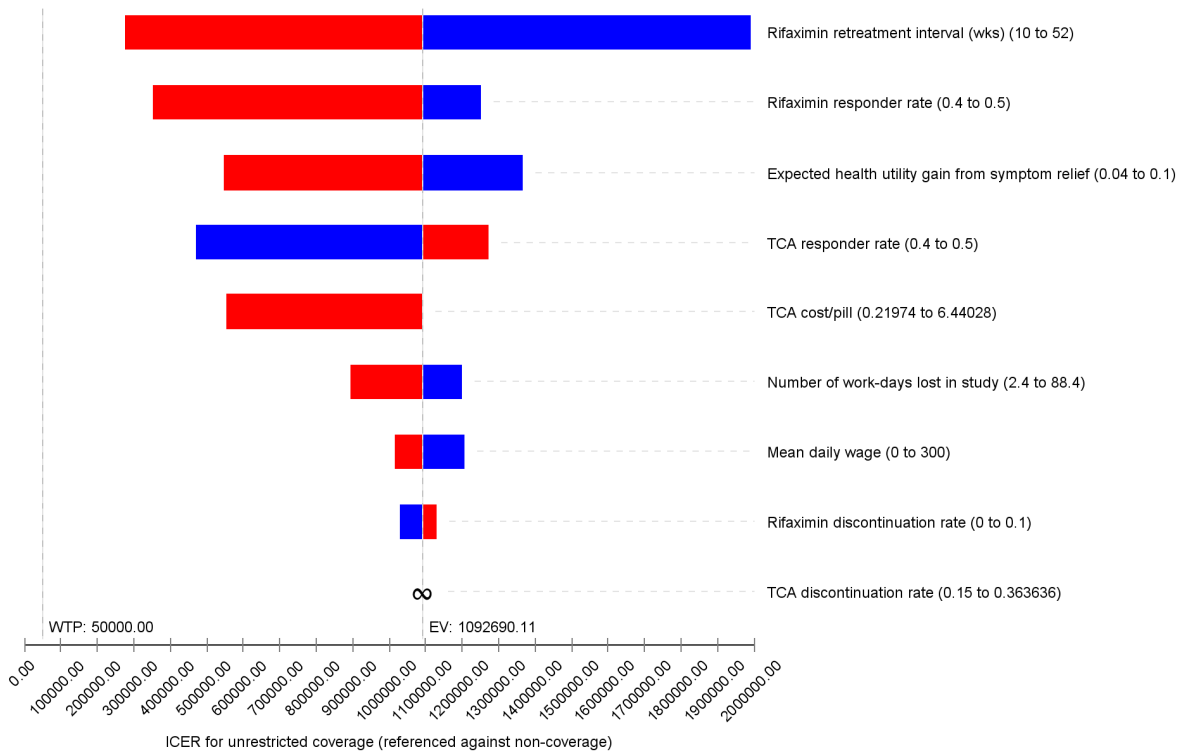

Red indicates that a decrease in the input value (compared to base-case value) leads to a decrease in the ICER. Blue indicates that an increase in the input value (compared to base-case value) leads to a decrease in the ICER compared to the average expected value (base-case ICER). ICER is most sensitive to the rifaximin retreatment interval.

Supplemental Figure 5: Tornado diagram evaluating sensitivity of model inputs from a societal perspective between rifaximin non-coverage and formulary-restricted coverage.

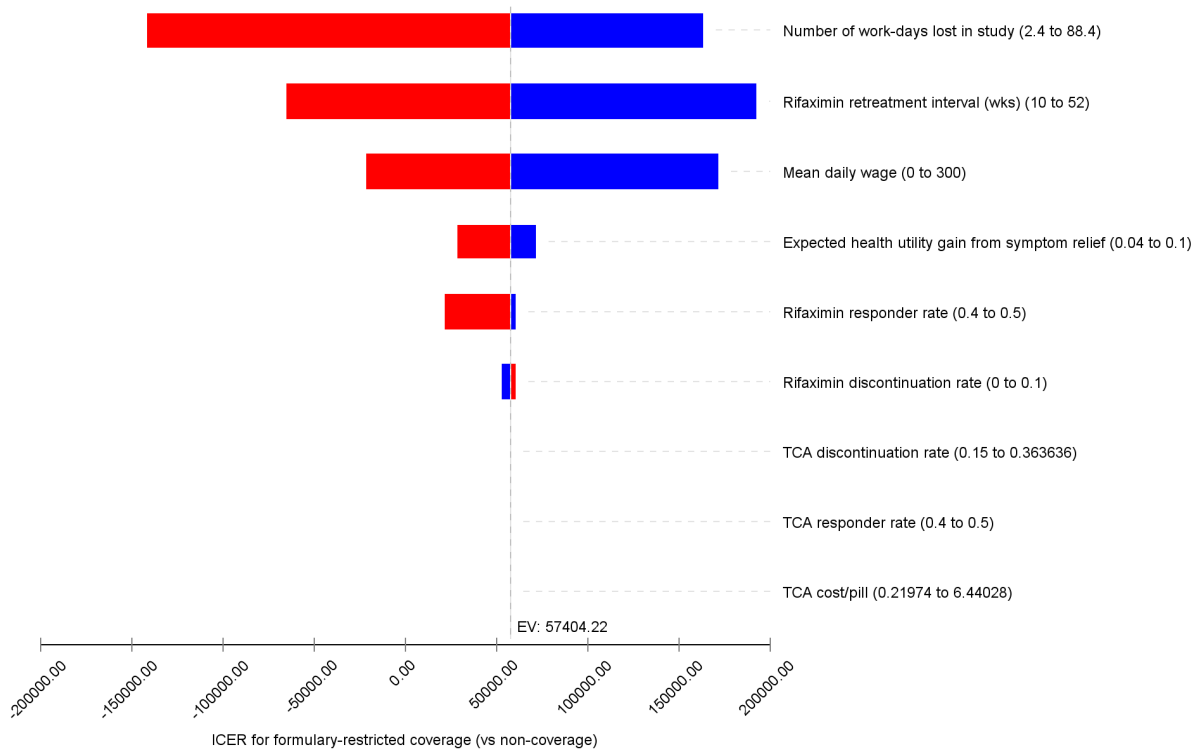

Red indicates that a decrease in the input value (compared to base-case value) leads to a decrease in the ICER. Blue indicates that an increase in the input value (compared to base-case value) leads to a decrease in the ICER compared to the average expected value (base-case ICER). From a societal perspective, ICER is most sensitive to the number of work-days lost due to active symptoms, followed by rifaximin retreatment interval and mean daily wage.



Supplemental Figure 6: Tornado diagram evaluating sensitivity of model inputs from a societal perspective between rifaximin formulary-restricted coverage and unrestricted coverage.

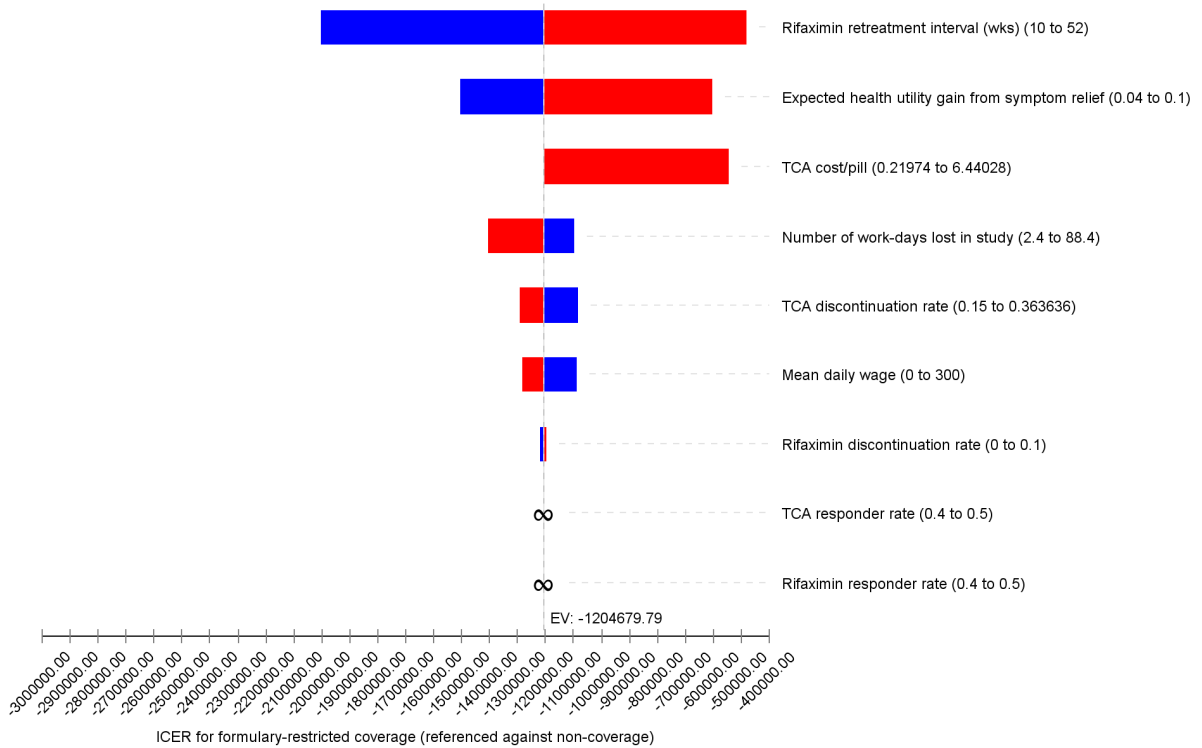

Red indicates that a decrease in the input value (compared to base-case value) leads to a decrease in the ICER. Blue indicates that an increase in the input value (compared to base-case value) leads to a decrease in the ICER compared to the average expected value (base-case ICER).

Negative ICER for this analysis specifically represent cost-savings and improved outcomes with formulary-restricted coverage compared to unrestricted coverage which is a stable finding throughout the range of estimates for each model input.

Supplemental Figure 7: Cost-effectiveness scatterplot of simulations across range of model inputs using probabilistic sensitivity analysis (payer perspective)

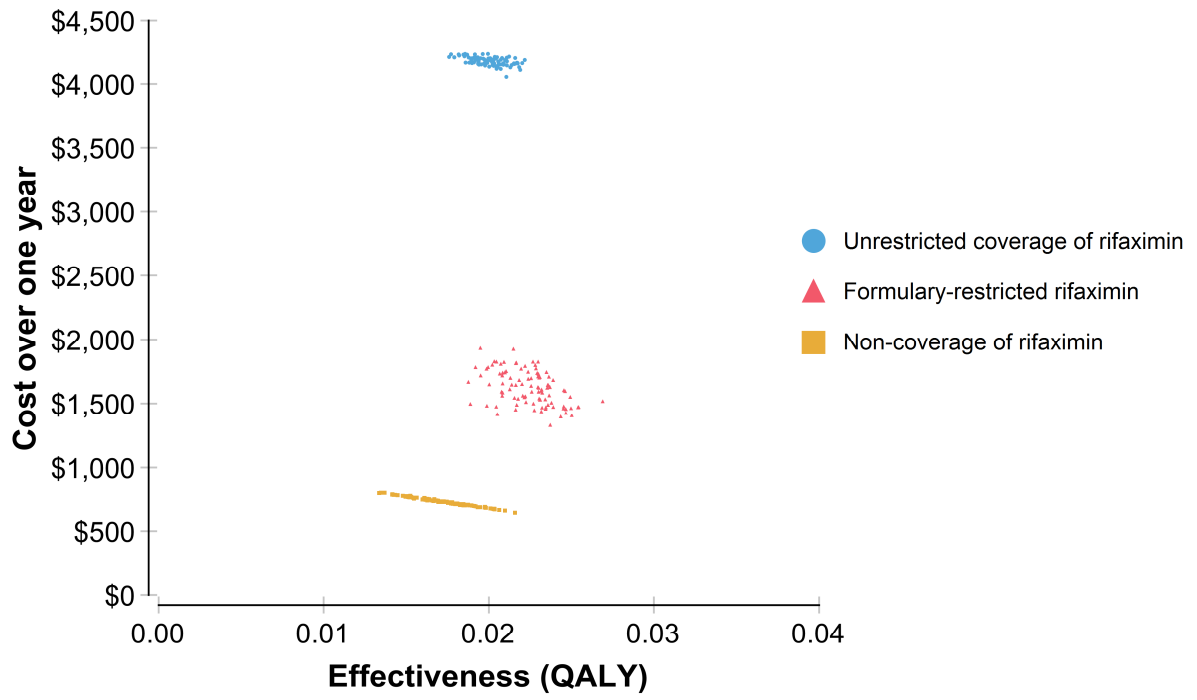

Supplemental Table 1: Univariate analysis of effects of rifaximin retreatment interval on cost-effectiveness from a payer perspective

| Rifaximin retreatment interval (weeks) | Treatment strategy             | Cost       | Effectiveness (QALY gained) | Cost-effectiveness (\$/QALY gained) | Incremental cost | Incremental effectiveness | Incremental cost-effectiveness | Net monetary benefit |
|----------------------------------------|--------------------------------|------------|-----------------------------|-------------------------------------|------------------|---------------------------|--------------------------------|----------------------|
| 10                                     | Non-coverage of rifaximin      | 727.955366 | 0.01720165                  | 42318.9363                          |                  |                           |                                | 1852.29155           |
| 10                                     | Formulary-restricted rifaximin | 2325.10935 | 0.022403                    | 103785.643                          | 1597.15398       | 0.00520135                | 307065.278                     | 1035.34007           |
| 10                                     | Unrestricted rifaximin         | 6748.68505 | 0.02005906                  | 336440.714                          | 4423.5757        | -0.00234393               | -1887243.86                    | -3739.82579          |
| 13                                     | Non-coverage of rifaximin      | 727.955366 | 0.01720165                  | 42318.9363                          |                  |                           |                                | 1852.29155           |
| 13                                     | Formulary-restricted rifaximin | 1941.49134 | 0.022403                    | 86662.129                           | 1213.53597       | 0.00520135                | 233311.731                     | 1418.95808           |
| 13                                     | Unrestricted rifaximin         | 5346.0817  | 0.02005906                  | 266517.037                          | 3404.59037       | -0.00234393               | -1452510.97                    | -2337.22245          |
| 16                                     | Non-coverage of rifaximin      | 727.955366 | 0.01720165                  | 42318.9363                          |                  |                           |                                | 1852.29155           |
| 16                                     | Formulary-restricted rifaximin | 1701.73008 | 0.022403                    | 75959.933                           | 973.774715       | 0.00520135                | 187215.765                     | 1658.71933           |
| 16                                     | Unrestricted rifaximin         | 4469.45461 | 0.02005906                  | 222814.74                           | 2767.72453       | -0.00234393               | -1180802.92                    | -1460.59536          |
| 19                                     | Non-coverage of rifaximin      | 727.955366 | 0.01720165                  | 42318.9363                          |                  |                           |                                | 1852.29155           |
| 19                                     | Formulary-restricted rifaximin | 1537.68291 | 0.022403                    | 68637.3778                          | 809.727541       | 0.00520135                | 155676.419                     | 1822.76651           |
| 19                                     | Unrestricted rifaximin         | 3869.65713 | 0.02005906                  | 192913.167                          | 2331.97423       | -0.00234393               | -994897.415                    | -860.797873          |
| 22                                     | Non-coverage of rifaximin      | 727.955366 | 0.01720165                  | 42318.9363                          |                  |                           |                                | 1852.29155           |
| 22                                     | Formulary-restricted rifaximin | 1418.37587 | 0.022403                    | 63311.8832                          | 690.420504       | 0.00520135                | 132738.713                     | 1942.07354           |
| 22                                     | Unrestricted rifaximin         | 3433.44078 | 0.02005906                  | 171166.569                          | 2015.06491       | -0.00234393               | -859693.408                    | -424.581522          |
| 25                                     | Non-coverage of rifaximin      | 727.955366 | 0.01720165                  | 42318.9363                          |                  |                           |                                | 1852.29155           |
| 25                                     | Formulary-restricted rifaximin | 1327.70252 | 0.022403                    | 59264.5072                          | 599.747157       | 0.00520135                | 115306.057                     | 2032.74689           |
| 25                                     | Unrestricted rifaximin         | 3101.91635 | 0.02005906                  | 154639.155                          | 1774.21383       | -0.00234393               | -756938.364                    | -93.0570956          |
| 28                                     | Non-coverage of rifaximin      | 727.955366 | 0.01720165                  | 42318.9363                          |                  |                           |                                | 1852.29155           |
| 28                                     | Formulary-restricted rifaximin | 1256.45918 | 0.022403                    | 56084.4261                          | 528.503812       | 0.00520135                | 101608.97                      | 2103.99023           |
| 28                                     | Unrestricted rifaximin         | 2841.43288 | 0.02005906                  | 141653.329                          | 1584.9737        | -0.00234393               | -676202.257                    | 167.426383           |
| 31                                     | Non-coverage of rifaximin      | 727.955366 | 0.01720165                  | 42318.9363                          |                  |                           |                                | 1852.29155           |
| 31                                     | Formulary-restricted rifaximin | 1199.00487 | 0.022403                    | 53519.8446                          | 471.049502       | 0.00520135                | 90562.9314                     | 2161.44454           |
| 31                                     | Unrestricted rifaximin         | 2631.36556 | 0.02005906                  | 131180.889                          | 1432.36069       | -0.00234393               | -611092.493                    | 377.493704           |
| 34                                     | Non-coverage of rifaximin      | 727.955366 | 0.01720165                  | 42318.9363                          |                  |                           |                                | 1852.29155           |
| 34                                     | Formulary-restricted rifaximin | 1151.68955 | 0.022403                    | 51407.8363                          | 423.734188       | 0.00520135                | 81466.1942                     | 2208.75986           |
| 34                                     | Unrestricted rifaximin         | 2458.36894 | 0.02005906                  | 122556.527                          | 1306.67938       | -0.00234393               | -557472.688                    | 550.490321           |
| 37                                     | Non-coverage of rifaximin      | 727.955366 | 0.01720165                  | 42318.9363                          |                  |                           |                                | 1852.29155           |
| 37                                     | Formulary-restricted rifaximin | 1112.04699 | 0.022403                    | 49638.3158                          | 384.091628       | 0.00520135                | 73844.6035                     | 2248.40242           |
| 37                                     | Unrestricted rifaximin         | 2313.42583 | 0.02005906                  | 115330.71                           | 1201.37883       | -0.00234393               | -512547.987                    | 695.433433           |
| 40                                     | Non-coverage of rifaximin      | 727.955366 | 0.01720165                  | 42318.9363                          |                  |                           |                                | 1852.29155           |
| 40                                     | Formulary-restricted rifaximin | 1078.35082 | 0.022403                    | 48134.2234                          | 350.395451       | 0.00520135                | 67366.2515                     | 2282.09859           |
| 40                                     | Unrestricted rifaximin         | 2190.22418 | 0.02005906                  | 109188.765                          | 1111.87336       | -0.00234393               | -474361.99                     | 818.635078           |
| 43                                     | Non-coverage of rifaximin      | 727.955366 | 0.01720165                  | 42318.9363                          |                  |                           |                                | 1852.29155           |
| 43                                     | Formulary-restricted rifaximin | 1049.35643 | 0.022403                    | 46840.0043                          | 321.401067       | 0.00520135                | 61791.8555                     | 2311.09298           |
| 43                                     | Unrestricted rifaximin         | 2084.21346 | 0.02005906                  | 103903.836                          | 1034.85703       | -0.00234393               | -441504.273                    | 924.645796           |
| 46                                     | Non-coverage of rifaximin      | 727.955366 | 0.01720165                  | 42318.9363                          |                  |                           |                                | 1852.29155           |
| 46                                     | Formulary-restricted rifaximin | 1024.14392 | 0.022403                    | 45714.5964                          | 296.188559       | 0.00520135                | 56944.5547                     | 2336.30549           |
| 46                                     | Unrestricted rifaximin         | 1992.03023 | 0.02005906                  | 99308.2457                          | 967.886306       | -0.00234393               | -412932.344                    | 1016.82903           |
| 49                                     | Non-coverage of rifaximin      | 727.955366 | 0.01720165                  | 42318.9363                          |                  |                           |                                | 1852.29155           |
| 49                                     | Formulary-restricted rifaximin | 1002.01866 | 0.022403                    | 44726.9936                          | 274.063297       | 0.00520135                | 52690.8009                     | 2358.43075           |
| 49                                     | Unrestricted rifaximin         | 1911.13474 | 0.02005906                  | 95275.3806                          | 909.116078       | -0.00234393               | -387859.019                    | 1097.72452           |
| 52                                     | Non-coverage of rifaximin      | 727.955366 | 0.01720165                  | 42318.9363                          |                  |                           |                                | 1852.29155           |
| 52                                     | Formulary-restricted rifaximin | 982.446315 | 0.022403                    | 43853.345                           | 254.490949       | 0.00520135                | 48927.8648                     | 2378.0031            |
| 52                                     | Unrestricted rifaximin         | 1839.57335 | 0.02005906                  | 91707.8461                          | 857.12703        | -0.00234393               | -365678.77                     | 1169.28591           |

Supplemental Table 2: Univariate analysis of effects of health utility gain from response to therapy on cost-effectiveness from a payer perspective. Higher-than-average health utility gains associated with response to therapy were found to favor a strategy of formulary-restricted rifaximin access over no rifaximin access at willingness-to-pay levels exceeding \$100,000/QALY gained.

| Health utility gain | Treatment strategy             | Cost       | Effectiveness (QALY gained) | Cost-effectiveness (\$/QALY gained) | Incremental cost | Incremental effectiveness | Incremental cost-effectiveness | Net monetary benefit |
|---------------------|--------------------------------|------------|-----------------------------|-------------------------------------|------------------|---------------------------|--------------------------------|----------------------|
| 0.04                | Non-coverage of rifaximin      | 727.955366 | 0.01376132                  | 52898.6704                          | 0                | 0                         | 0                              | 1336.24216           |
| 0.04                | Formulary-restricted rifaximin | 1621.80966 | 0.0179224                   | 90490.6679                          | 893.854297       | 0.00416108                | 214813.053                     | 1066.54987           |
| 0.04                | Unrestricted rifaximin         | 4177.24559 | 0.01604725                  | 260309.134                          | 2555.43592       | -0.00187515               | -1362791.97                    | -1770.15818          |
| 0.044               | Non-coverage of rifaximin      | 727.955366 | 0.01513745                  | 48089.7004                          | 0                | 0                         | 0                              | 1542.66192           |
| 0.044               | Formulary-restricted rifaximin | 1621.80966 | 0.01971464                  | 82264.2436                          | 893.854297       | 0.00457719                | 195284.594                     | 1335.38582           |
| 0.044               | Unrestricted rifaximin         | 4177.24559 | 0.01765197                  | 236644.667                          | 2555.43592       | -0.00206266               | -1238901.79                    | -1529.44944          |
| 0.048               | Non-coverage of rifaximin      | 727.955366 | 0.01651358                  | 44082.2254                          | 0                | 0                         | 0                              | 1749.08167           |
| 0.048               | Formulary-restricted rifaximin | 1621.80966 | 0.02150688                  | 75408.8899                          | 893.854297       | 0.0049933                 | 179010.878                     | 1604.22177           |
| 0.048               | Unrestricted rifaximin         | 4177.24559 | 0.0192567                   | 216924.278                          | 2555.43592       | -0.00225018               | -1135659.97                    | -1288.7407           |
| 0.052               | Non-coverage of rifaximin      | 727.955366 | 0.01788971                  | 40691.2849                          | 0                | 0                         | 0                              | 1955.50142           |
| 0.052               | Formulary-restricted rifaximin | 1621.80966 | 0.02329912                  | 69608.2061                          | 893.854297       | 0.0054094                 | 165240.81                      | 1873.05773           |
| 0.052               | Unrestricted rifaximin         | 4177.24559 | 0.02086142                  | 200237.795                          | 2555.43592       | -0.00243769               | -1048301.51                    | -1048.03196          |
| 0.056               | Non-coverage of rifaximin      | 727.955366 | 0.01926584                  | 37784.7646                          | 0                | 0                         | 0                              | 2161.92118           |
| 0.056               | Formulary-restricted rifaximin | 1621.80966 | 0.02509136                  | 64636.1914                          | 893.854297       | 0.00582551                | 153437.895                     | 2141.89368           |
| 0.056               | Unrestricted rifaximin         | 4177.24559 | 0.02246615                  | 185935.095                          | 2555.43592       | -0.00262521               | -973422.833                    | -807.323215          |
| 0.06                | Non-coverage of rifaximin      | 727.955366 | 0.02064198                  | 35265.7803                          | 0                | 0                         | 0                              | 2368.34093           |
| 0.06                | Formulary-restricted rifaximin | 1621.80966 | 0.0268836                   | 60327.1119                          | 893.854297       | 0.00624162                | 143208.702                     | 2410.72963           |
| 0.06                | Unrestricted rifaximin         | 4177.24559 | 0.02407087                  | 173539.422                          | 2555.43592       | -0.00281272               | -908527.977                    | -566.614474          |
| 0.064               | Non-coverage of rifaximin      | 727.955366 | 0.02201811                  | 33061.669                           | 0                | 0                         | 0                              | 2574.76068           |
| 0.064               | Formulary-restricted rifaximin | 1621.80966 | 0.02867583                  | 56556.6674                          | 893.854297       | 0.00665773                | 134258.158                     | 2679.56558           |
| 0.064               | Unrestricted rifaximin         | 4177.24559 | 0.0256756                   | 162693.209                          | 2555.43592       | -0.00300024               | -851744.979                    | -325.905733          |
| 0.068               | Non-coverage of rifaximin      | 727.955366 | 0.02339424                  | 31116.865                           | 0                | 0                         | 0                              | 2781.18044           |
| 0.068               | Formulary-restricted rifaximin | 1621.80966 | 0.03046807                  | 53229.8047                          | 893.854297       | 0.00707384                | 126360.619                     | 2948.40154           |
| 0.068               | Unrestricted rifaximin         | 4177.24559 | 0.02728032                  | 153123.02                           | 2555.43592       | -0.00318775               | -801642.333                    | -85.1969925          |
| 0.072               | Non-coverage of rifaximin      | 727.955366 | 0.02477037                  | 29388.1502                          | 0                | 0                         | 0                              | 2987.60019           |
| 0.072               | Formulary-restricted rifaximin | 1621.80966 | 0.03226031                  | 50272.5933                          | 893.854297       | 0.00748994                | 119340.585                     | 3217.23749           |
| 0.072               | Unrestricted rifaximin         | 4177.24559 | 0.02888505                  | 144616.185                          | 2555.43592       | -0.00337527               | -757106.648                    | 155.511748           |
| 0.076               | Non-coverage of rifaximin      | 727.955366 | 0.0261465                   | 27841.4055                          | 0                | 0                         | 0                              | 3194.01994           |
| 0.076               | Formulary-restricted rifaximin | 1621.80966 | 0.03405255                  | 47626.6673                          | 893.854297       | 0.00790605                | 113059.502                     | 3486.07344           |
| 0.076               | Unrestricted rifaximin         | 4177.24559 | 0.03048977                  | 137004.807                          | 2555.43592       | -0.00356278               | -717258.93                     | 396.220489           |
| 0.08                | Non-coverage of rifaximin      | 727.955366 | 0.02752263                  | 26449.3352                          | 0                | 0                         | 0                              | 3400.4397            |
| 0.08                | Formulary-restricted rifaximin | 1621.80966 | 0.03584479                  | 45245.334                           | 893.854297       | 0.00832216                | 107406.527                     | 3754.9094            |
| 0.08                | Unrestricted rifaximin         | 4177.24559 | 0.0320945                   | 130154.567                          | 2555.43592       | -0.00375029               | -681395.983                    | 636.92923            |
| 0.084               | Non-coverage of rifaximin      | 727.955366 | 0.02889877                  | 25189.8431                          | 0                | 0                         | 0                              | 3606.85945           |
| 0.084               | Formulary-restricted rifaximin | 1621.80966 | 0.03763703                  | 43090.7942                          | 893.854297       | 0.00873827                | 102291.93                      | 4023.74535           |
| 0.084               | Unrestricted rifaximin         | 4177.24559 | 0.03369922                  | 123956.73                           | 2555.43592       | -0.00393781               | -648948.555                    | 877.637971           |
| 0.088               | Non-coverage of rifaximin      | 727.955366 | 0.0302749                   | 24044.8502                          | 0                | 0                         | 0                              | 3813.2792            |
| 0.088               | Formulary-restricted rifaximin | 1621.80966 | 0.03942927                  | 41132.1218                          | 893.854297       | 0.00915438                | 97642.2968                     | 4292.5813            |
| 0.088               | Unrestricted rifaximin         | 4177.24559 | 0.03530395                  | 118322.333                          | 2555.43592       | -0.00412532               | -619450.894                    | 1118.34671           |
| 0.092               | Non-coverage of rifaximin      | 727.955366 | 0.03165103                  | 22999.4219                          | 0                | 0                         | 0                              | 4019.69896           |
| 0.092               | Formulary-restricted rifaximin | 1621.80966 | 0.04122151                  | 39343.7687                          | 893.854297       | 0.00957048                | 93396.9796                     | 4561.41726           |
| 0.092               | Unrestricted rifaximin         | 4177.24559 | 0.03690867                  | 113177.884                          | 2555.43592       | -0.00431284               | -592518.246                    | 1359.05545           |
| 0.096               | Non-coverage of rifaximin      | 727.955366 | 0.03302716                  | 22041.1127                          | 0                | 0                         | 0                              | 4226.11871           |
| 0.096               | Formulary-restricted rifaximin | 1621.80966 | 0.04301375                  | 37704.445                           | 893.854297       | 0.00998659                | 89505.4388                     | 4830.25321           |
| 0.096               | Unrestricted rifaximin         | 4177.24559 | 0.0385134                   | 108462.139                          | 2555.43592       | -0.00450035               | -567829.986                    | 1599.76419           |
| 0.1                 | Non-coverage of rifaximin      | 727.955366 | 0.03440329                  | 21159.4682                          | 0                | 0                         | 0                              | 4432.53846           |
| 0.1                 | Formulary-restricted rifaximin | 1621.80966 | 0.04480599                  | 36196.2672                          | 893.854297       | 0.0104027                 | 85925.2212                     | 5099.08916           |
| 0.1                 | Unrestricted rifaximin         | 4177.24559 | 0.04011812                  | 104123.653                          | 2555.43592       | -0.00468787               | -545116.786                    | 1840.47293           |

Supplemental Table 3: Univariate analysis of effects of rifaximin retreatment interval on cost-effectiveness from a payer perspective. A rifaximin responder rate less than 46% favored a TCA-only approach.

| Health utility gain | Treatment strategy             | Cost       | Effectiveness (QALY gained) | Cost-effectiveness (\$/QALY gained) | Incremental cost | Incremental effectiveness | Incremental cost-effectiveness | Net monetary benefit |
|---------------------|--------------------------------|------------|-----------------------------|-------------------------------------|------------------|---------------------------|--------------------------------|----------------------|
| 0.4                 | Non-coverage of rifaximin      | 727.955366 | 0.01720165                  | 42318.9363                          | 0                | 0                         | 0                              | 1852.29155           |
| 0.4                 | Formulary-restricted rifaximin | 1623.57057 | 0.02231289                  | 72763.783                           | 895.615207       | 0.00511125                | 175224.374                     | 1723.36352           |
| 0.4                 | Unrestricted rifaximin         | 4183.68391 | 0.01972963                  | 212050.849                          | 2560.11334       | -0.00258327               | -991036.632                    | -1224.24004          |
| 0.41                | Non-coverage of rifaximin      | 727.955366 | 0.01720165                  | 42318.9363                          | 0                | 0                         | 0                              | 1852.29155           |
| 0.41                | Formulary-restricted rifaximin | 1621.07328 | 0.02244068                  | 72238.1689                          | 893.117916       | 0.00523903                | 170473.938                     | 1745.02799           |
| 0.41                | Unrestricted rifaximin         | 4174.55319 | 0.02019683                  | 206693.528                          | 2553.47991       | -0.00224385               | -1137990.81                    | -1145.02932          |
| 0.42                | Non-coverage of rifaximin      | 727.955366 | 0.01720165                  | 42318.9363                          | 0                | 0                         | 0                              | 1852.29155           |
| 0.42                | Formulary-restricted rifaximin | 1618.57599 | 0.02256846                  | 71718.5068                          | 890.620625       | 0.00536681                | 165949.714                     | 1766.69246           |
| 0.42                | Unrestricted rifaximin         | 4165.42247 | 0.02066403                  | 201578.458                          | 2546.84648       | -0.00190443               | -1337327.07                    | -1065.8186           |
| 0.43                | Non-coverage of rifaximin      | 727.955366 | 0.01720165                  | 42318.9363                          | 0                | 0                         | 0                              | 1852.29155           |
| 0.43                | Formulary-restricted rifaximin | 1616.0787  | 0.02269624                  | 71204.6962                          | 888.123333       | 0.00549459                | 161635.918                     | 1788.35693           |
| 0.43                | Unrestricted rifaximin         | 4156.29175 | 0.02113123                  | 196689.571                          | 2540.21305       | -0.00156501               | -1623127.18                    | -986.607876          |
| 0.44                | Non-coverage of rifaximin      | 727.955366 | 0.01720165                  | 42318.9363                          | 0                | 0                         | 0                              | 1852.29155           |
| 0.44                | Formulary-restricted rifaximin | 1613.58141 | 0.02282402                  | 70696.6388                          | 885.626042       | 0.00562237                | 157518.204                     | 1810.0214            |
| 0.44                | Unrestricted rifaximin         | 4147.16103 | 0.02159843                  | 192012.189                          | 2533.57962       | -0.00122559               | -2067227.71                    | -907.397155          |
| 0.45                | Non-coverage of rifaximin      | 727.955366 | 0.01720165                  | 42318.9363                          | 0                | 0                         | 0                              | 1852.29155           |
| 0.45                | Formulary-restricted rifaximin | 1611.08412 | 0.0229518                   | 70194.2384                          | 883.128751       | 0.00575015                | 153583.5                       | 1831.68587           |
| 0.45                | Unrestricted rifaximin         | 4138.03031 | 0.02206563                  | 187532.878                          | 2526.94619       | -0.00088617               | -2851523.39                    | -828.186433          |
| 0.46                | Non-coverage of rifaximin      | 727.955366 | 0.01720165                  | 42318.9363                          | 0                | 0                         | 0                              | 1852.29155           |
| 0.46                | Formulary-restricted rifaximin | 1608.58683 | 0.02307958                  | 69697.4012                          | 880.63146        | 0.00587794                | 149819.869                     | 1853.35034           |
| 0.46                | Unrestricted rifaximin         | 4128.89959 | 0.02253283                  | 183239.316                          | 2520.31276       | -0.00054676               | -4609580.83                    | -748.975712          |
| 0.47                | Non-coverage of rifaximin      | 727.955366 | 0.01720165                  | 42318.9363                          | 0                | 0                         | 0                              | 1852.29155           |
| 0.47                | Formulary-restricted rifaximin | 1606.08953 | 0.02320736                  | 69206.0352                          | 878.134168       | 0.00600572                | 146216.393                     | 1875.01482           |
| 0.47                | Unrestricted rifaximin         | 4119.76887 | 0.02300003                  | 179120.184                          | 2513.67933       | -0.00020734               | -12123670.2                    | -669.764991          |
| 0.48                | Non-coverage of rifaximin      | 727.955366 | 0.01720165                  | 42318.9363                          | 0                | 0                         | 0                              | 1852.29155           |
| 0.48                | Formulary-restricted rifaximin | 1603.59224 | 0.02333514                  | 68720.0506                          | 875.636877       | 0.0061335                 | 142763.062                     | 1896.67929           |
| 0.48                | Unrestricted rifaximin         | 4110.63814 | 0.02346723                  | 175165.065                          | 2507.0459        | 0.00013208                | 18980937                       | -590.55427           |
| 0.49                | Non-coverage of rifaximin      | 727.955366 | 0.01720165                  | 42318.9363                          | 0                | 0                         | 0                              | 1852.29155           |
| 0.49                | Formulary-restricted rifaximin | 1601.09495 | 0.02346292                  | 68239.3594                          | 873.139586       | 0.00626128                | 139450.684                     | 1918.34376           |
| 0.49                | Unrestricted rifaximin         | 4101.50742 | 0.02393443                  | 171364.354                          | 2500.41247       | 0.0004715                 | 5303089.28                     | -511.343548          |
| 0.5                 | Non-coverage of rifaximin      | 727.955366 | 0.01720165                  | 42318.9363                          | 0                | 0                         | 0                              | 1852.29155           |
| 0.5                 | Formulary-restricted rifaximin | 1598.59766 | 0.02359071                  | 67763.8756                          | 870.642295       | 0.00638906                | 136270.8                       | 1940.00823           |
| 0.5                 | Unrestricted rifaximin         | 4092.3767  | 0.02440163                  | 167709.182                          | 2493.77904       | 0.00081092                | 3075247.02                     | -432.132827          |

Supplemental Figure 8: Bivariate analysis of effects of daily wage and days of work-productivity lost on preferred strategy (willingness to pay = \$50,000 per QALY)

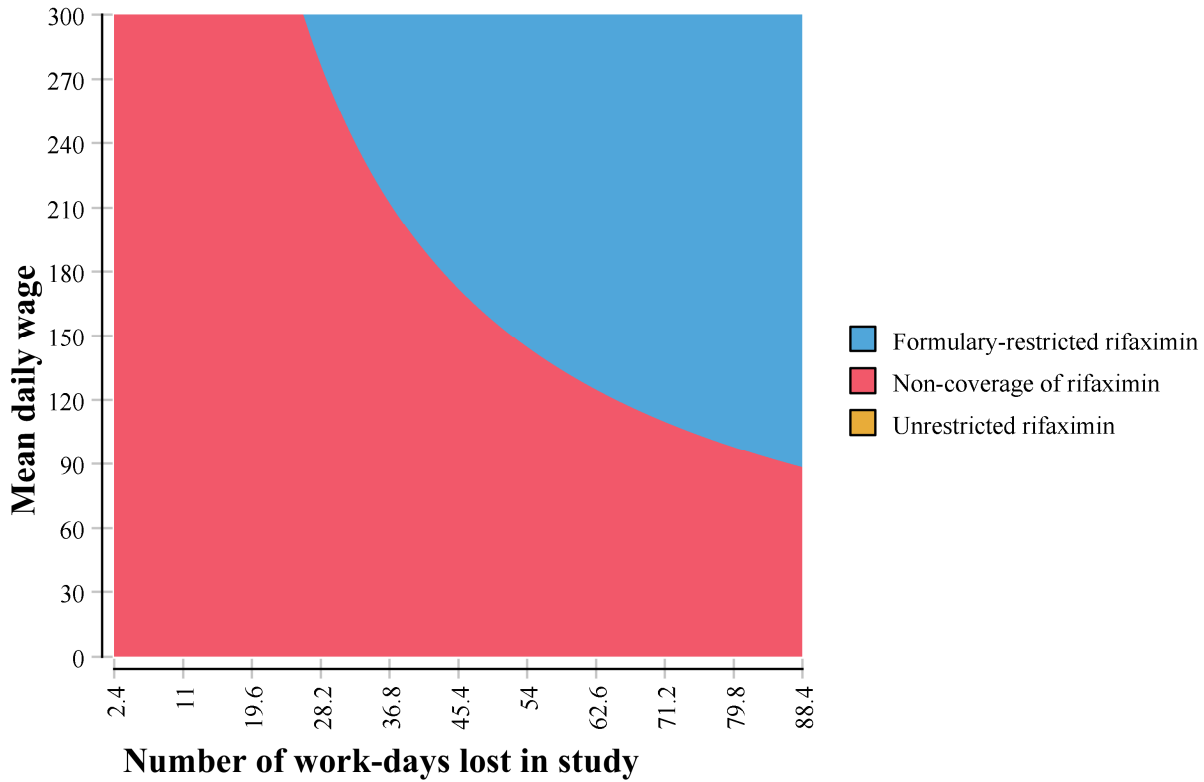

Supplemental Figure 9: Bivariate analysis of effects of daily wage and days of work-productivity lost on preferred strategy (willingness to pay = \$100,000 per QALY)

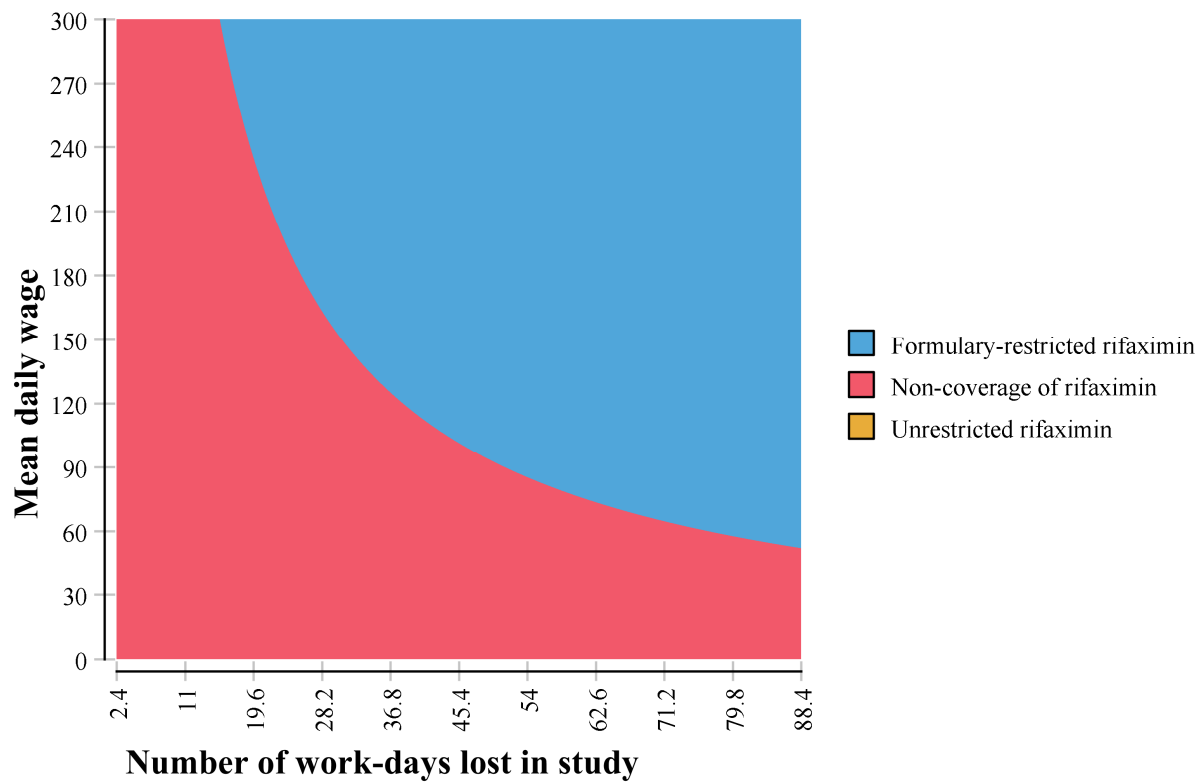

Supplemental Figure 10: Bivariate analysis of effects of daily wage and days of work-productivity lost on preferred strategy (willingness to pay = \$150,000 per QALY)

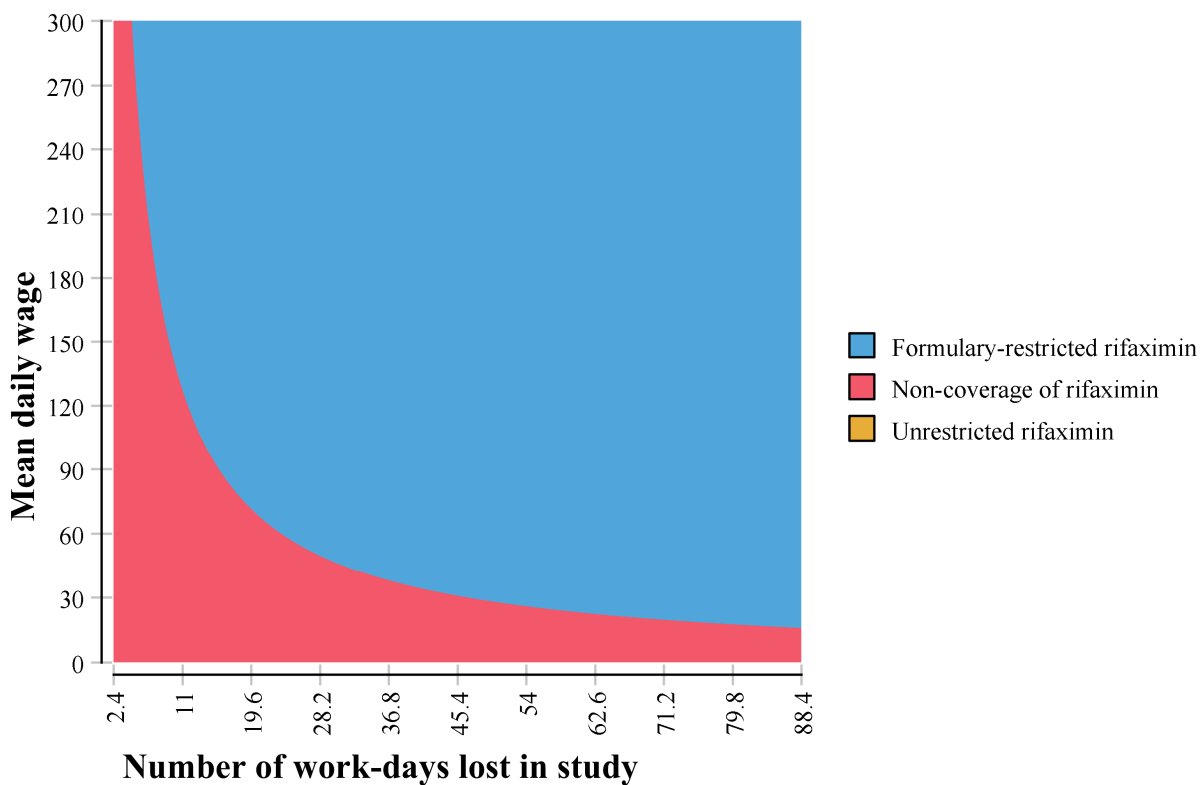

Supplement: NIHMS1522929-supplement-1.pdf [file NIHMS1522929-supplement-1.pdf]
